# Supplementary material for: Aldehyde N,N-dimethylhydrazone-based fluorescent substrate for peroxidase-mediated assays
Source: Royal Society of Chemistry journal article supplement (doi:10.1039/d2ra00087c), 2022-01-01
Supplement: d2ra00087c1.pdf [file d2ra00087c1.pdf]

Supplementary information

**Aldehyde N,N-dimethylhydrazone-based fluorescent substrate for peroxidase-mediated assays**

Soyeon Yoo, Sudeok Kim, Sangyeon Jeon and Min Su Han\*

Department of Chemistry, Gwangju Institute of Science and Technology (GIST), Gwangju 61005,  
Republic of Korea

\* Corresponding author. E-mail: happyhan@gist.ac.kr; Tel.: +82 62 715 2848; Fax: +82 62 715 2866

## Supplementary results

### NMR spectra

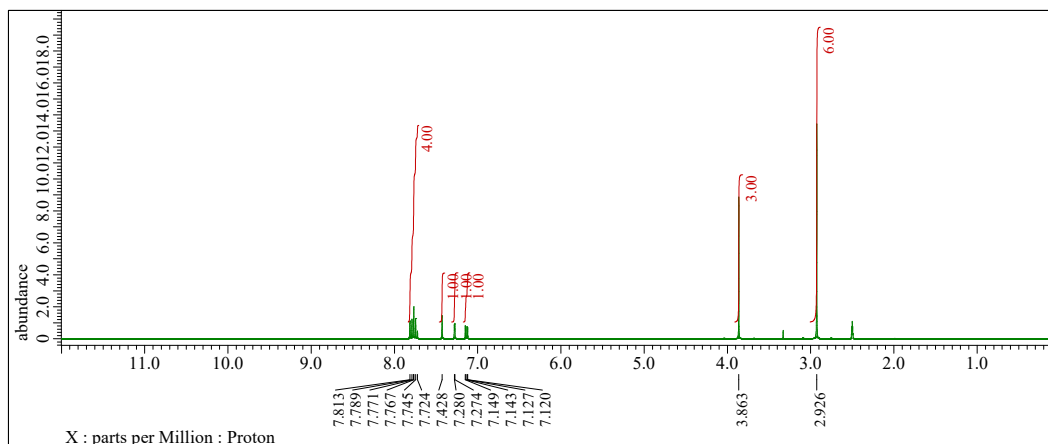

Fig. S1 <sup>1</sup>H NMR (400 MHz, DMSO-d<sub>6</sub>) of MNDH.

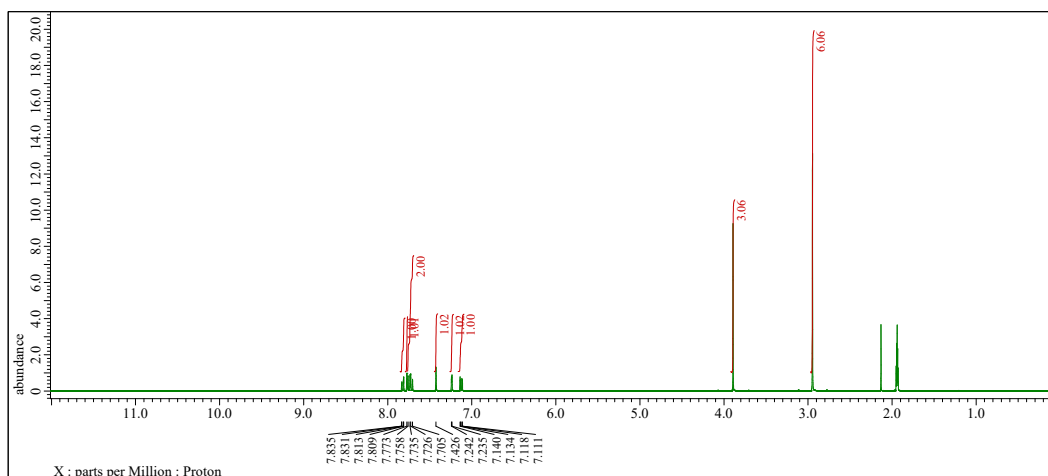

Fig. S2 <sup>1</sup>H NMR (400 MHz, ACN-d<sub>3</sub>) of MNDH.

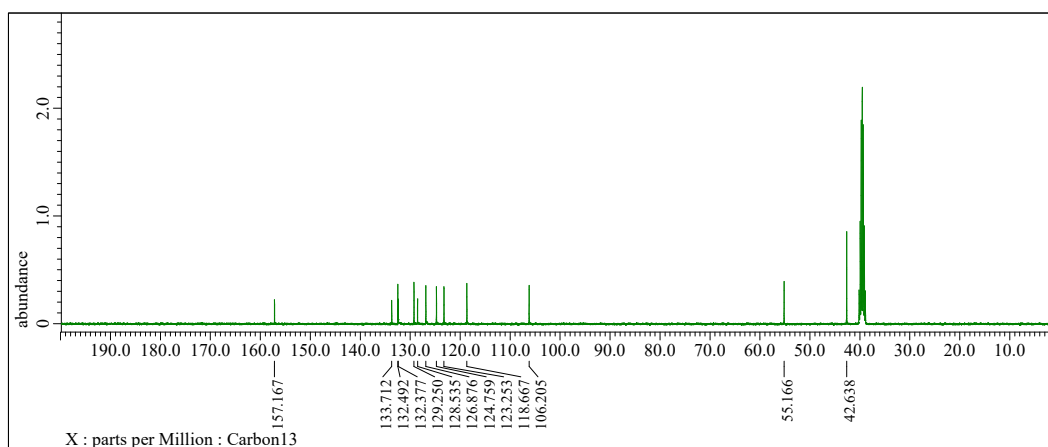

Fig. S3 <sup>13</sup>C NMR (101 MHz, DMSO-d<sub>6</sub>) of MNDH.

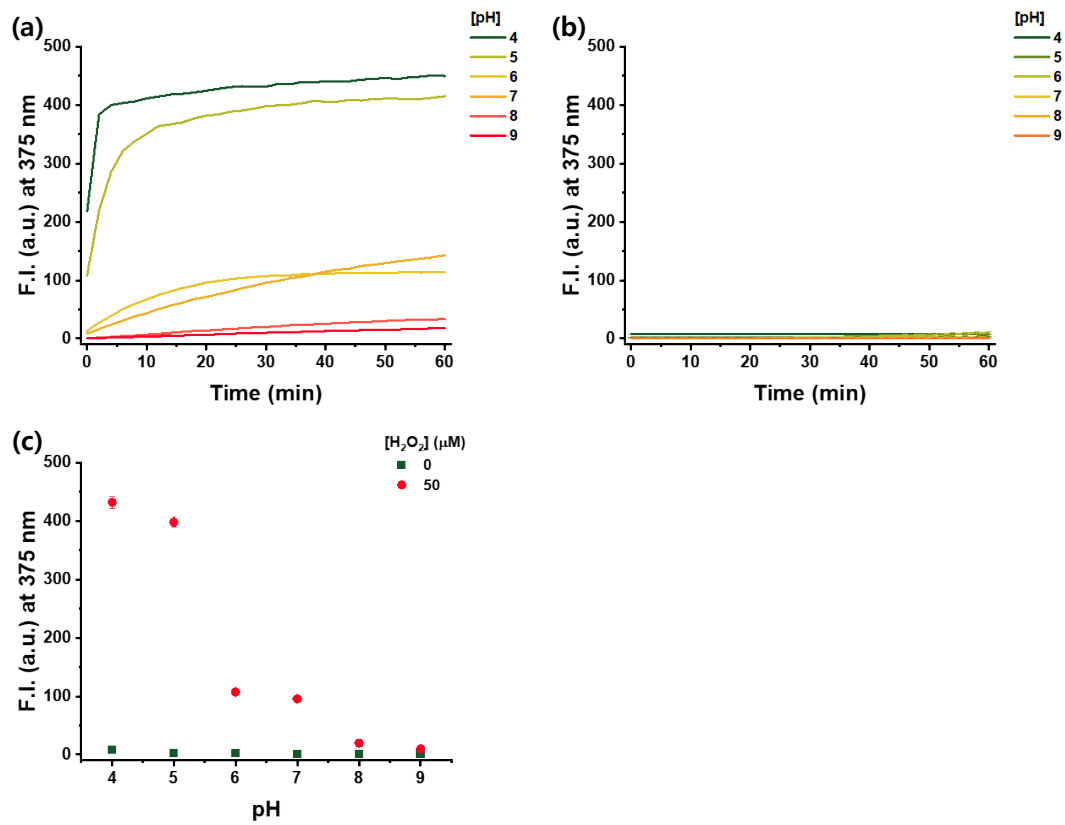

**Fig. S4** Fluorescence intensity versus time for **MNDH** in the various pH buffer solution containing the HRP and (a) with or (b) without H<sub>2</sub>O<sub>2</sub>. (c) Plot of fluorescence intensity for assay solutions versus pH in the present or absent of H<sub>2</sub>O<sub>2</sub>. [**MNDH**] = 20  $\mu$ M, [H<sub>2</sub>O<sub>2</sub>] = 50  $\mu$ M, [HRP] = 50 mU/mL, [Acetate pH 4-5, MES pH 6 and Tris-HCl pH 7-9] = 20 mM.

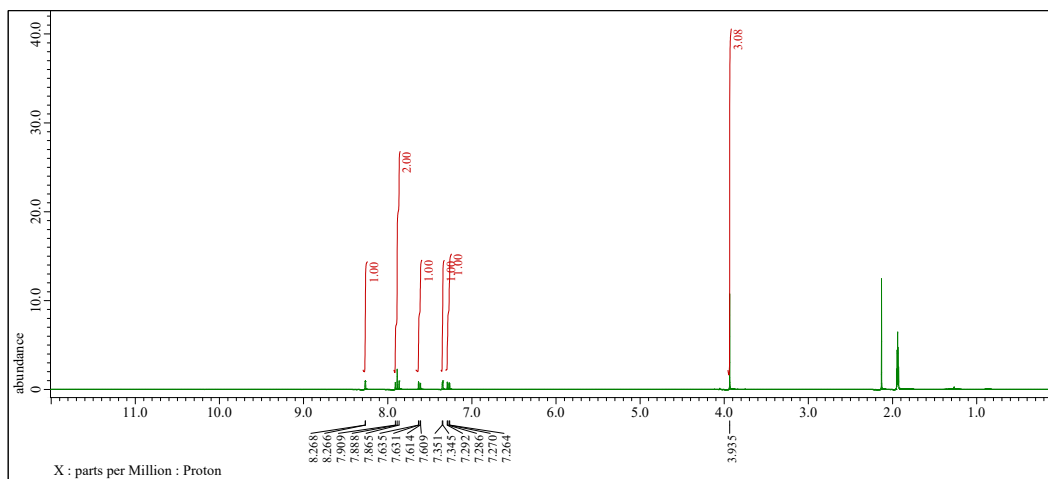

**Fig. S5**  $^1\text{H}$  NMR (400 MHz, ACN- $d_3$ ) of oxMNDH.

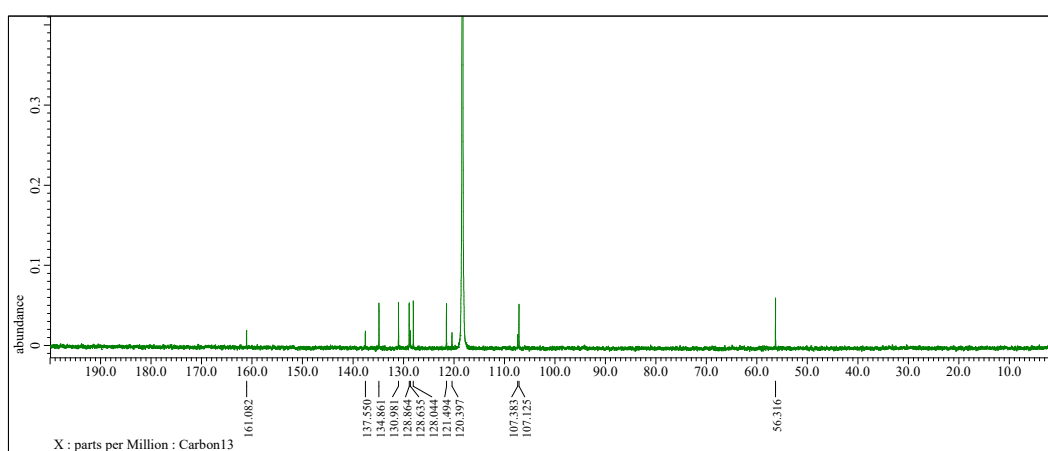

**Fig. S6**  $^{13}\text{C}$  NMR (101 MHz, ACN- $d_3$ ) of oxMNDH.

### Synthesis of 6-Methoxy-2-naphthonitrile

A 6-Methoxy-2-naphthonitrile was synthesized following the previous literature.<sup>1</sup> The methyltrioxorhenium (0.004 mmol, 0.001 g) and  $\text{H}_2\text{O}_2$  (1.85 mmol, 0.16 mL) were added to the ethanol (1 mL) and cooled at  $-30\text{ }^\circ\text{C}$ . After MNDH (0.87 mmol, 0.20 g) dissolved in dichloromethane (1 mL) was added dropwise to above the mixture, the mixture was stirred at  $-30\text{ }^\circ\text{C}$  for 2 hr. The product was extracted with ethyl acetate. The organic layer was dried using sodium sulfate and concentrated under reduced pressure. The mixture was then purified by column chromatography ( $\text{CHCl}_3$ ) to yield a white crystalline solid.  $^1\text{H}$ -NMR (400 MHz, ACN- $d_3$ )  $\delta$  8.26 (d,  $J = 0.9\text{ Hz}$ , 1H), 7.88 (t,  $J = 9.0\text{ Hz}$ , 2H), 7.62 (dd,  $J = 8.5, 1.8\text{ Hz}$ , 1H), 7.34 (d,  $J = 2.4\text{ Hz}$ , 1H), 7.27 (dd,  $J = 9.0, 2.6\text{ Hz}$ , 1H), 3.93 (s, 3H).  $^{13}\text{C}$ -NMR (101 MHz, ACN- $d_3$ )  $\delta$  161.0, 137.5, 134.8, 131.0, 128.8, 128.6, 128.0, 121.4, 120.4, 107.3, 107.1, 56.3.

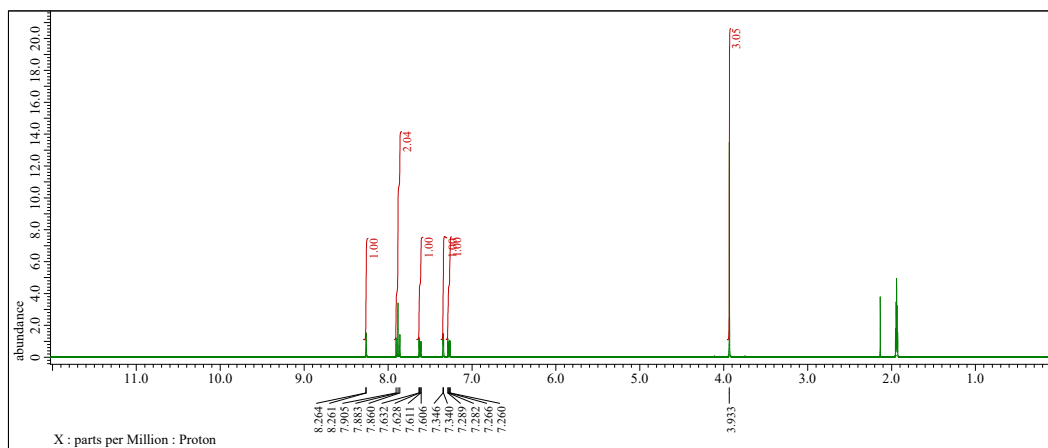

Fig. S7  $^1\text{H}$  NMR (400 MHz,  $\text{ACN-d}_3$ ) of 6-methoxy-2-naphthonitrile.

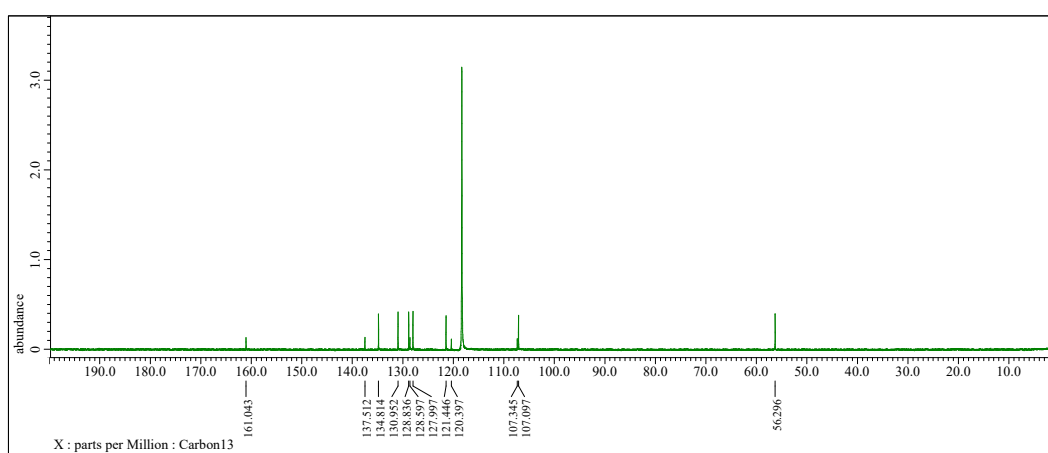

Fig. S8  $^{13}\text{C}$  NMR (400 MHz,  $\text{ACN-d}_3$ ) of 6-methoxy-2-naphthonitrile.

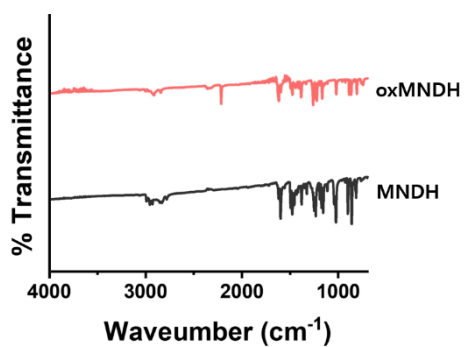

Fig. S9 FT-IR spectra of MNDH and oxMNDH.

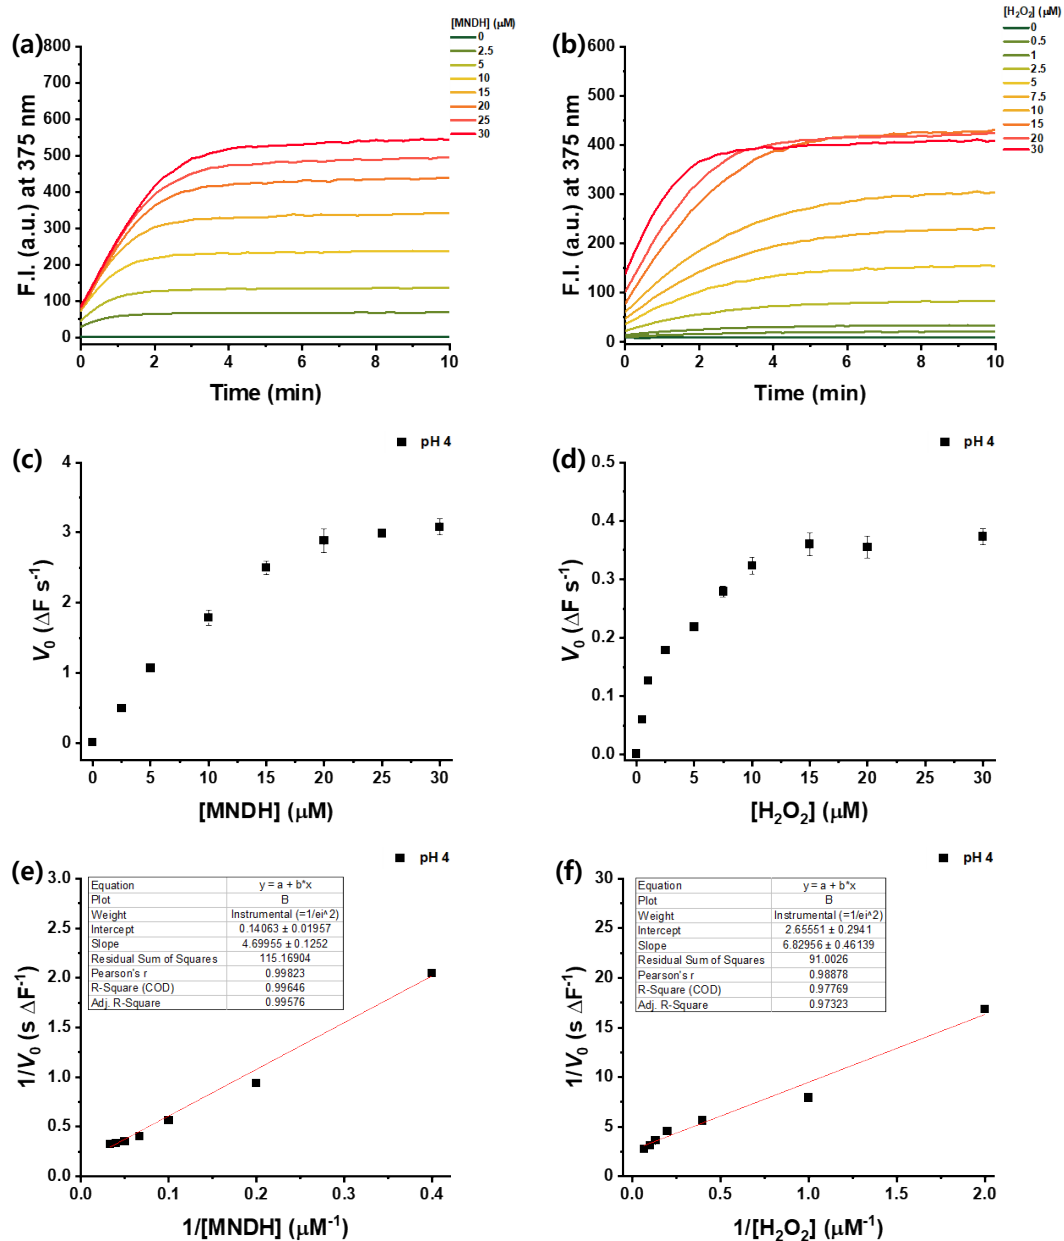

**Fig. S10** Fluorescence intensity versus time for the assay solution containing the various concentration of (a) MNDH or (b)  $\text{H}_2\text{O}_2$  at a fixed concentration of the other, in the presence of HRP, at pH 4. Michaelis-Menten plots of the assay solution versus the various concentrations of (c) MNDH or (d)  $\text{H}_2\text{O}_2$ . Double reciprocal plots of the peroxidase-like activity of assay solution versus concentration of (e) MNDH or (f)  $\text{H}_2\text{O}_2$ .  $[\text{MNDH}] = 20 \mu\text{M}$ ,  $[\text{H}_2\text{O}_2] = 50 \mu\text{M}$ ,  $[\text{HRP}] = 50 \text{ mU/mL}$ ,  $[\text{Acetate pH 4.0}] = 20 \text{ mM}$ .

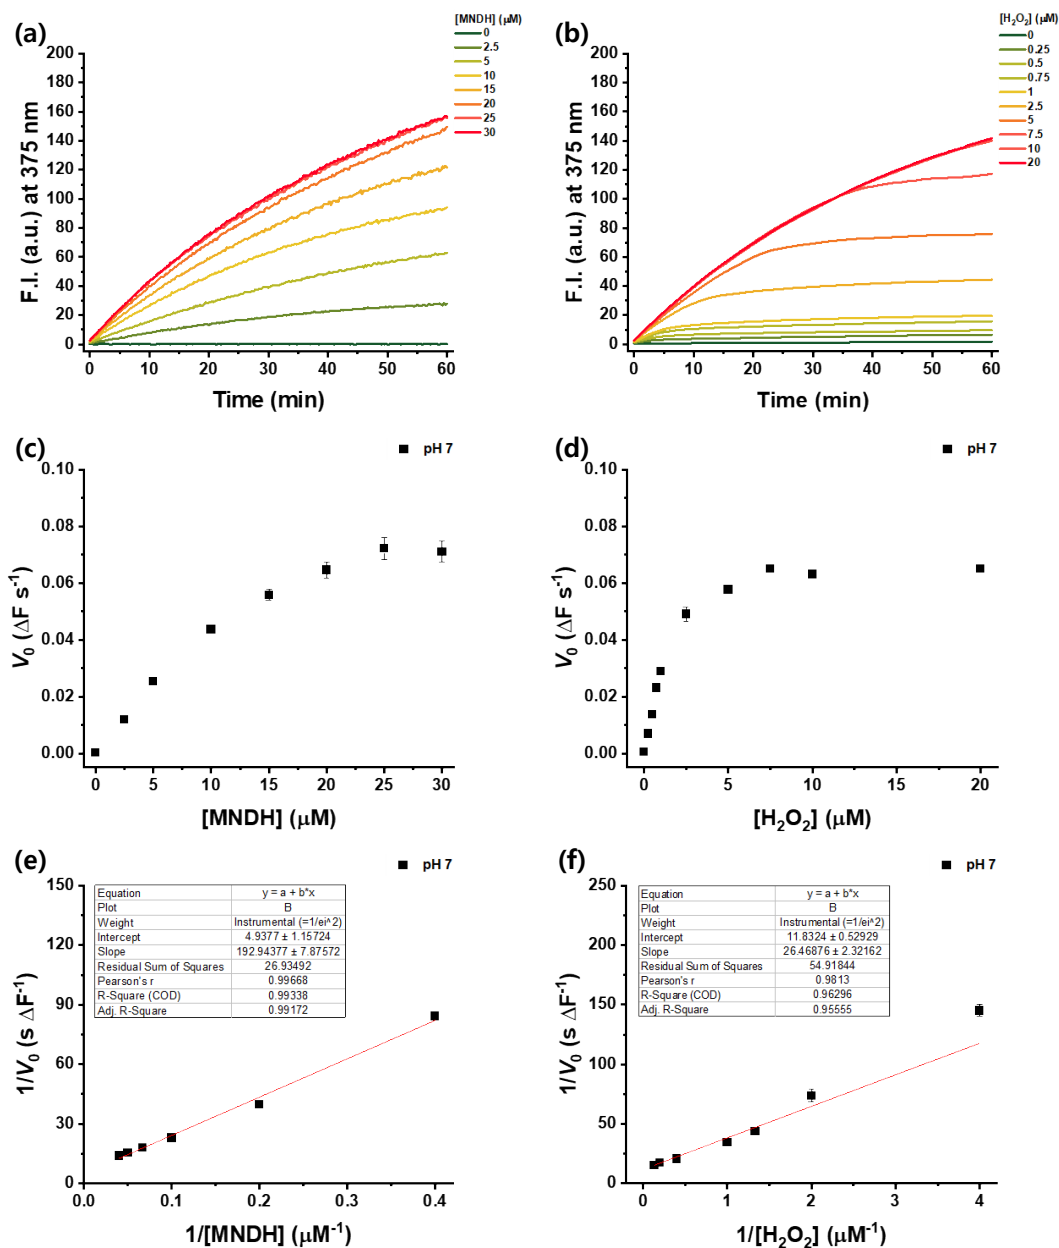

**Fig. S11** Fluorescence intensity versus time for the assay solution containing the various concentration of (a) **MNDH** or (b) **H<sub>2</sub>O<sub>2</sub>** at a fixed concentration of the other, in the presence of **HRP**, at **pH 7**. Michaelis-Menten plots of the assay solution versus the various concentrations of (c) **MNDH** or (d) **H<sub>2</sub>O<sub>2</sub>**. Double reciprocal plots of the peroxidase-like activity of assay solution versus concentration of (e) **MNDH** or (f) **H<sub>2</sub>O<sub>2</sub>**. [**MNDH**] = 20 μM, [**H<sub>2</sub>O<sub>2</sub>**] = 50 μM, [**HRP**] = 50 μU/mL, [Tris-HCl pH 7.0] = 20 mM.

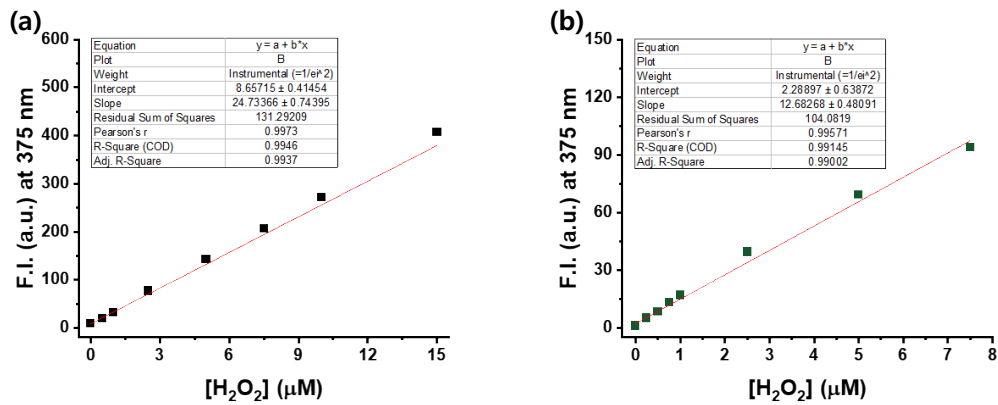

**Fig. S12** Linear range of H<sub>2</sub>O<sub>2</sub> titration at (a) pH 4 and (b) pH 7. [MNDH] = 20 μM, [H<sub>2</sub>O<sub>2</sub>] = 50 μM, [HRP] = 50 mU/mL, [Acetate pH 4.0 and Tris-HCl pH 7.0] = 20 mM.

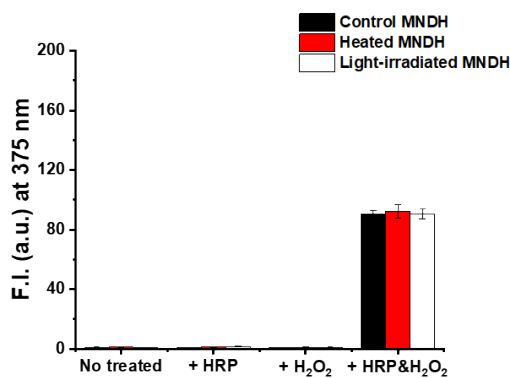

**Fig. S13** Plot of fluorescence intensity of MNDH previously exposed to heat and light in buffer solutions containing various combinations of HRP and H<sub>2</sub>O<sub>2</sub>. [MNDH] = 20 μM, [H<sub>2</sub>O<sub>2</sub>] = 50 μM, [HRP] = 50 mU/mL, [Tris-HCl pH 7.0] = 20 mM.

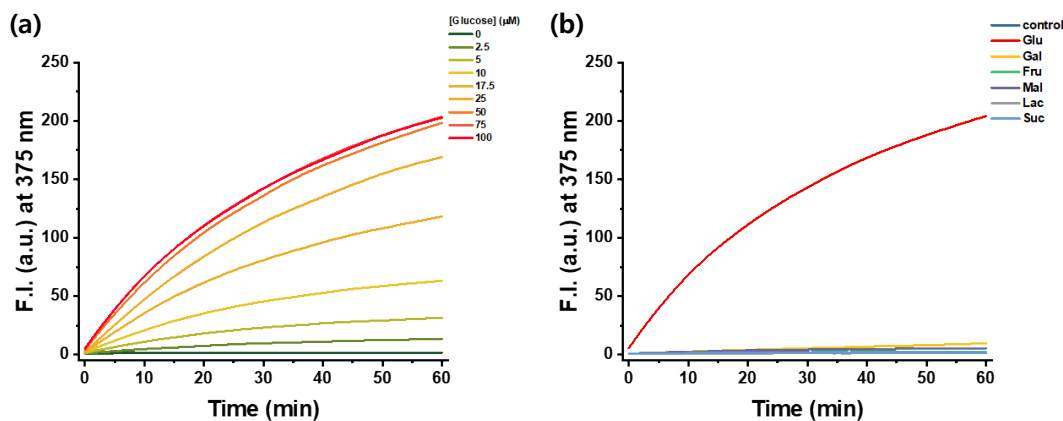

**Fig. S14** Fluorescence intensity versus time for assay solutions versus (a) concentration of glucose or (b) type of saccharide. [MNDH] = 20 μM, [glucose] = 50 μM, [other saccharide] = 500 μM, [HRP] = 100 mU/mL, [GOx] = 500 mU/mL, [Tris-HCl pH 7.0] = 20 mM.



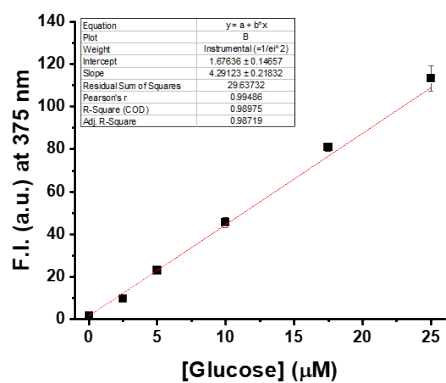

**Fig. S15** Linear range of glucose titration. [MNDH] = 20 µM, [HRP] = 100 mU/mL, [GOx] = 500 mU/mL, [Tris-HCl pH 7.0] = 20 mM.

## Reference

1. H. Rudler, B. Denise and S. Masi, *C. R. Acad. Sci. Paris, Serie IIc, Chimie/Chemistry*, 2000, **3**, 793-801.
